# Supplementary material for: Coordination-based vapochromic behavior of a luminescent Pt(ii) complex with potassium ions
Source: Royal Society of Chemistry journal article supplement (doi:10.1039/d1ra05236e), 2021-01-01
Supplement: d1ra05236e1.pdf [file d1ra05236e1.pdf]

## Supporting Information

### Coordination-based Vapochromic Behavior of a Luminescent Pt(II) Complex with Potassium Ions

Yasuhiro Shigeta,<sup>\*a</sup> Ryota Nanko,<sup>b</sup> Shogo Amemori,<sup>a,c,d</sup> and Motohiro Mizuno<sup>\*a,c,d</sup>

<sup>a</sup> NanoMaterials Research Institute, Kanazawa University, Kanazawa 920-1192, Japan

<sup>b</sup> College of Science and Engineering, School of Chemistry, Kanazawa University, Kanazawa 920-1192, Japan

<sup>c</sup> Graduate School of Natural Science and Technology, Kanazawa University, Kanazawa 920-1192, Japan

<sup>d</sup> Institute of Frontier Science Initiative, Kanazawa University, Kanazawa 920-1192, Japan

#### Contents

Figure S1. Crystal structures of **1·3DMA** and **1·0.75DMF** with atom labels around Pt(II) ions.

Figure S2. <sup>1</sup>H NMR spectrum of **1**.

Figure S3 Lattice constant refinement fitting for **1** after DMA and DMF vapor exposure.

Figure S4. Thermogravimetric analysis of DMA-vapor exposed **1**.

Figure S5. Thermogravimetric analysis of DMF-vapor exposed **1**.

Figure S6. <sup>1</sup>H NMR spectrum of DMA vapor exposed **1**.

Figure S7. <sup>1</sup>H NMR spectrum of DMF vapor exposed **1**.

Figure S8. Photographs of **1·3DMA** and **1·0.75DMF** compared with **1** in DMA and DMF solution.

Figure S9. Absorption spectra of **1** in DMA and DMF solution.

Figure S10. Photographs of **1·0.3H<sub>2</sub>O** compared with DMF and DMA vapor exposed samples under ambient light and UV light irradiation.

Figure S11. Emission spectrum of DMA solution of **1**.

Table S1. Selected bond length of **1·3DMA** and **1·0.75DMF** at 90 K.

Table S2. Comparison for possible molecular composition and that found from elemental analysis.

Table S3. Lattice constant refinement result for **1** after DMA and DMF vapor exposure compared with the single crystals.

**1·3DMA**

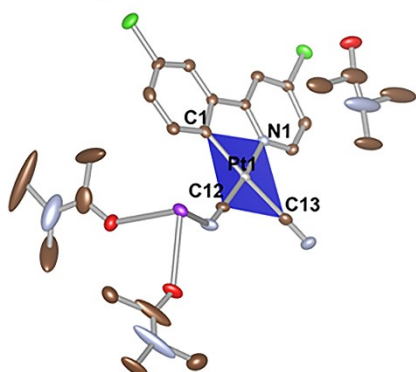

**1·0.75DMF**

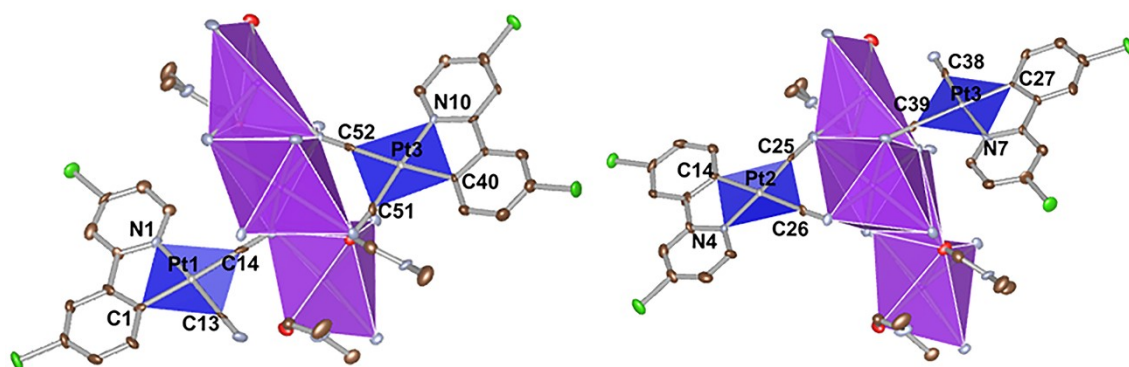

Figure S1. Crystal structures of **1·3DMA** (top) and **1·0.75DMF** (bottom) with atom labels around Pt(II) ions.

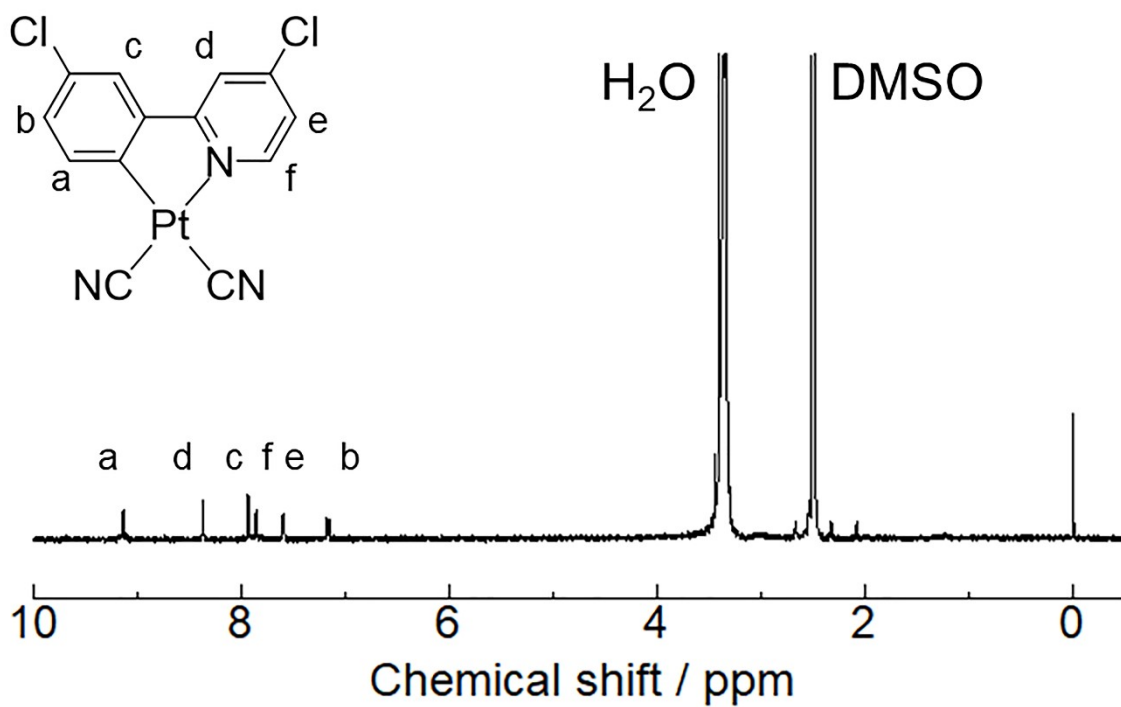

Figure S2.  $^1\text{H}$  NMR spectrum of **1** (400 MHz,  $\text{DMSO-d}_6$ ).

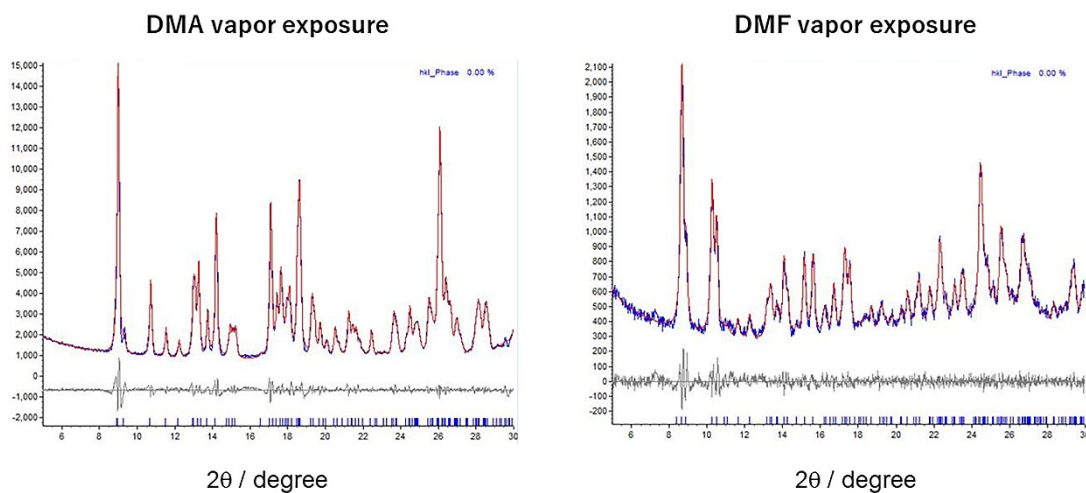

Figure S3. Lattice constant refinement fitting for **1** after DMA (left) and DMF (right) vapor exposure. Blue, red and gray lines show experimental, calculated and residual, respectively.

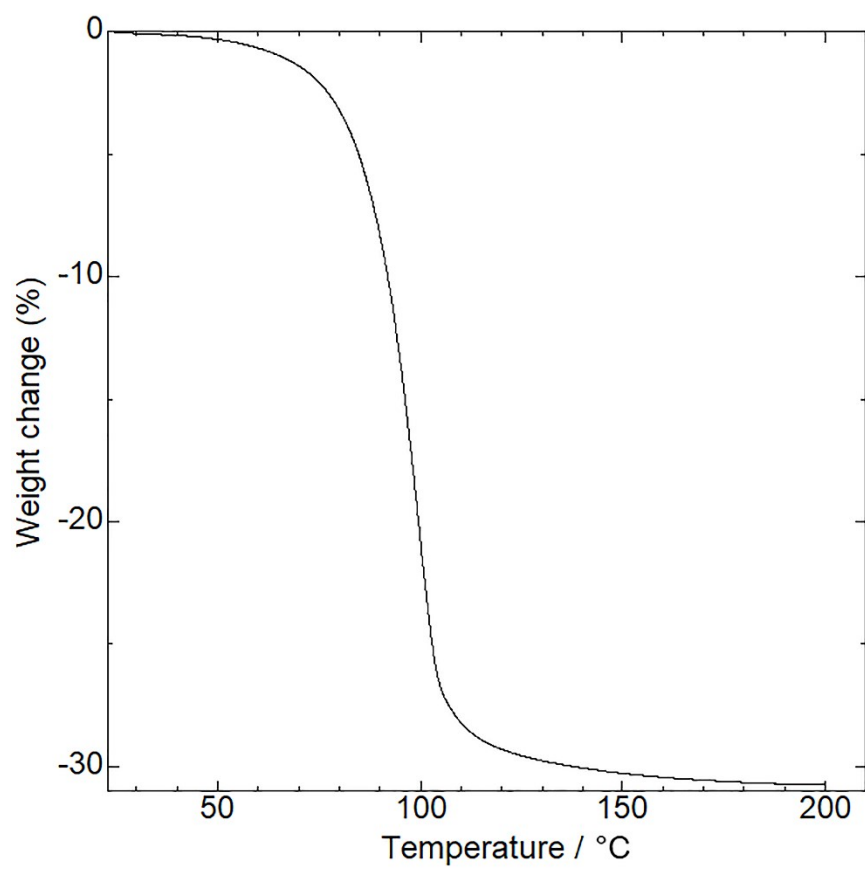

Figure S4. Thermogravimetric analysis of DMA-vapor exposed **1**.

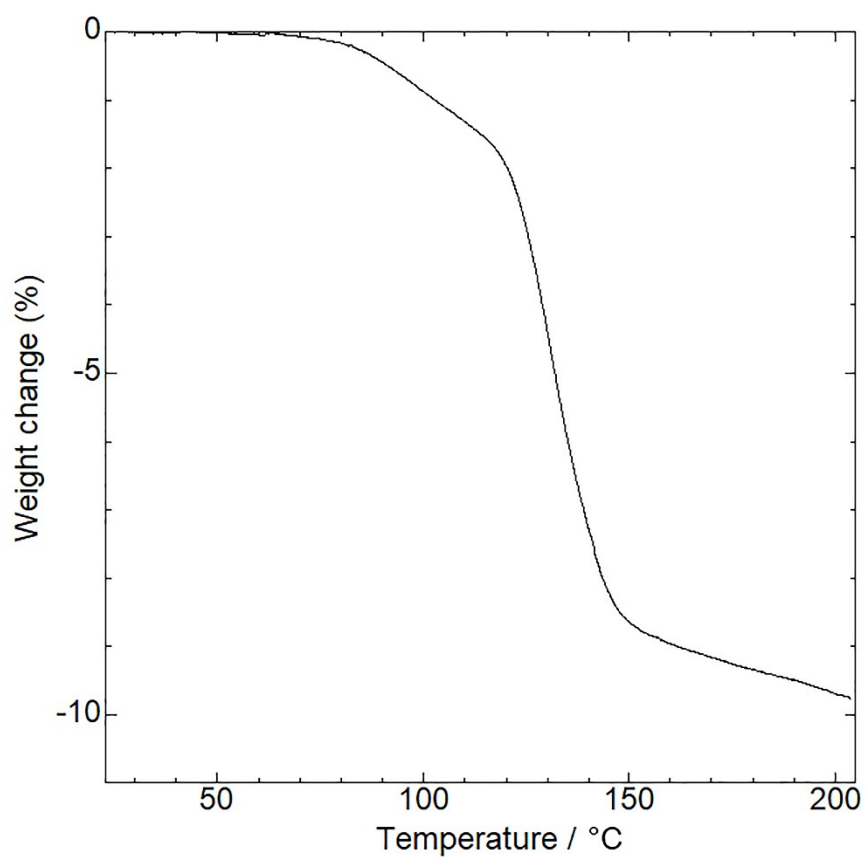

Figure S5. Thermogravimetric analysis of DMF-vapor exposed **1**.

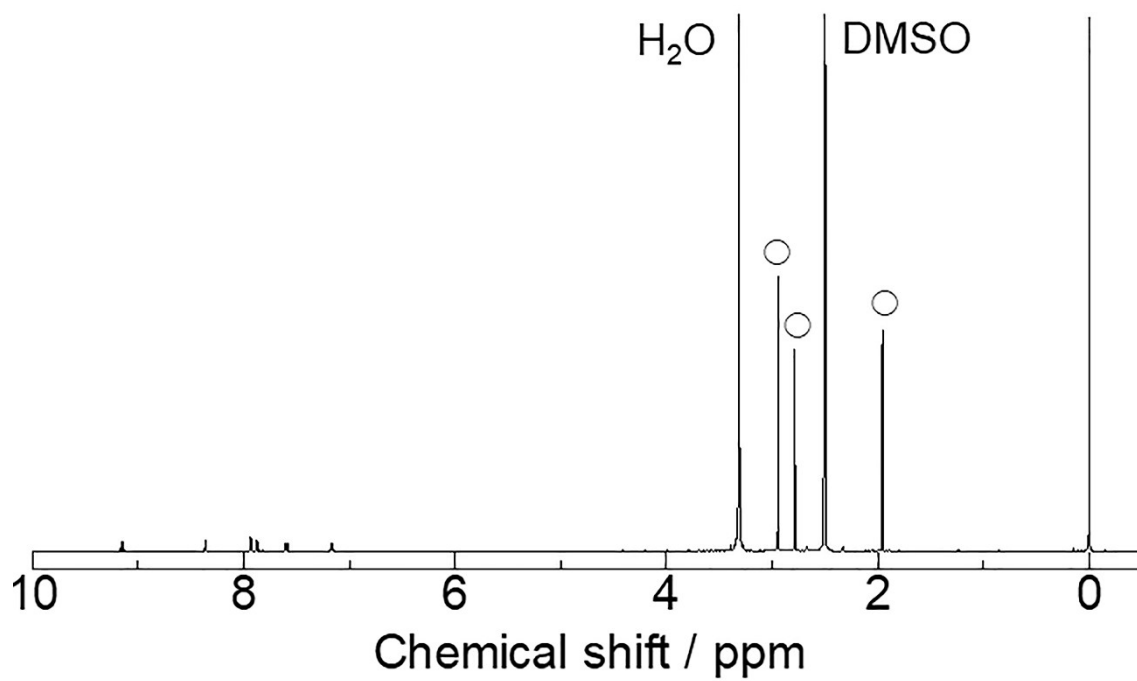

Figure S6.  $^1\text{H}$  NMR spectrum of DMA vapor exposed **1** (400 MHz,  $\text{DMSO-}d_6$ ). Circles indicate the signals from DMA.

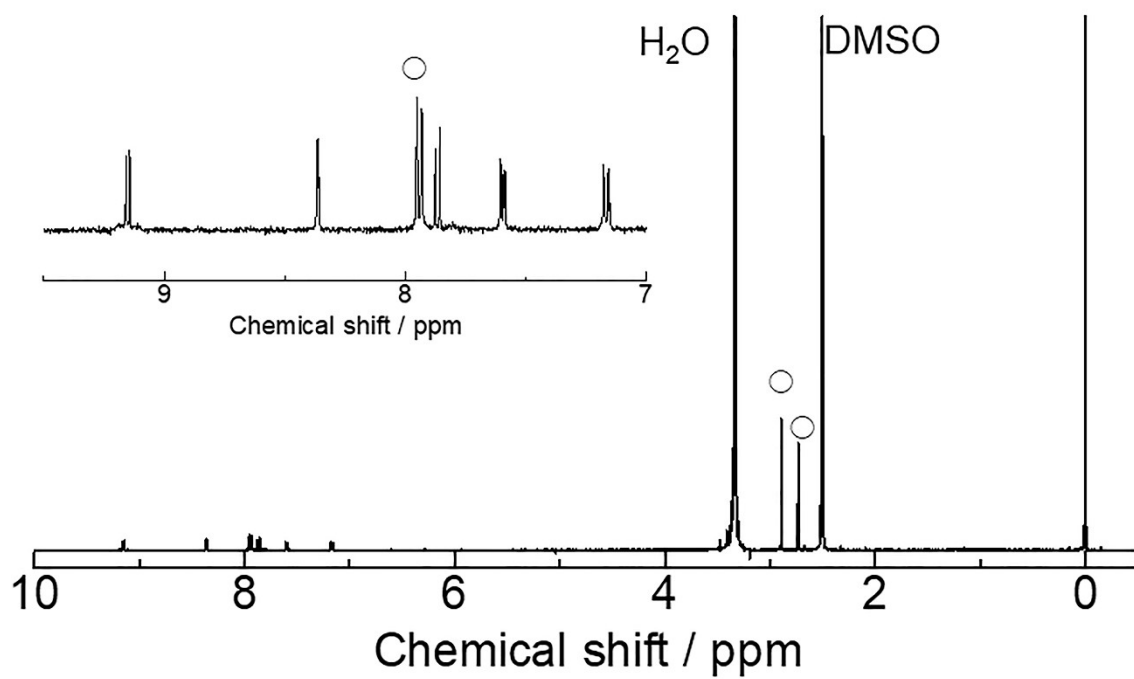

Figure S7.  $^1\text{H}$  NMR spectrum of DMA vapor exposed 1 (400 MHz,  $\text{DMSO-}d_6$ ). Circles indicate the signals from DMF.



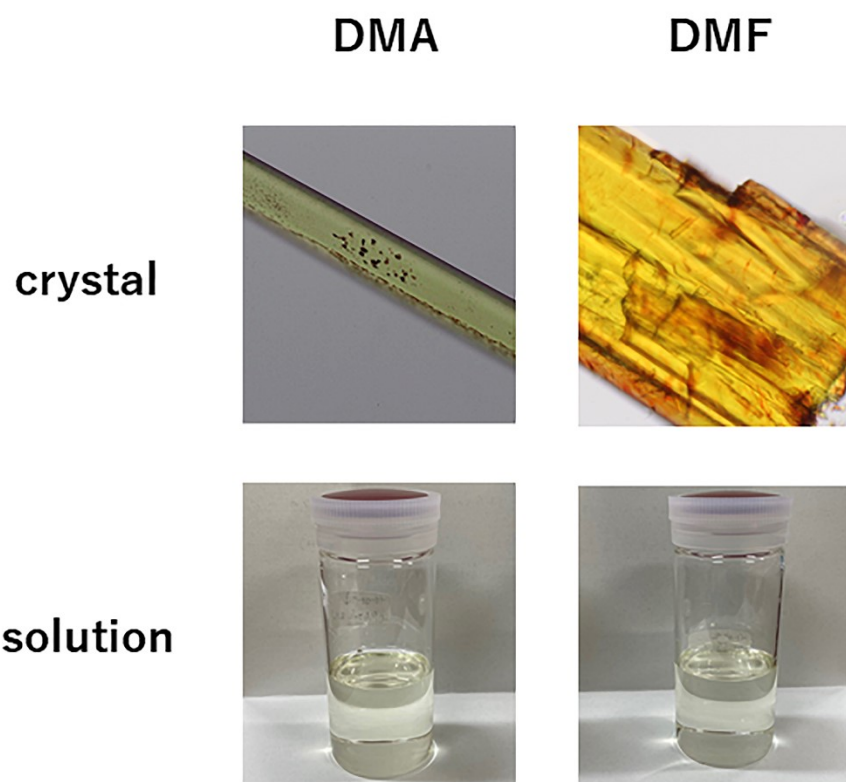

Figure S8. Photographs of  $1 \cdot 3\text{DMA}$  and  $1 \cdot 0.75\text{DMF}$  (top) compared with **1** in DMA and DMF solution (bottom).

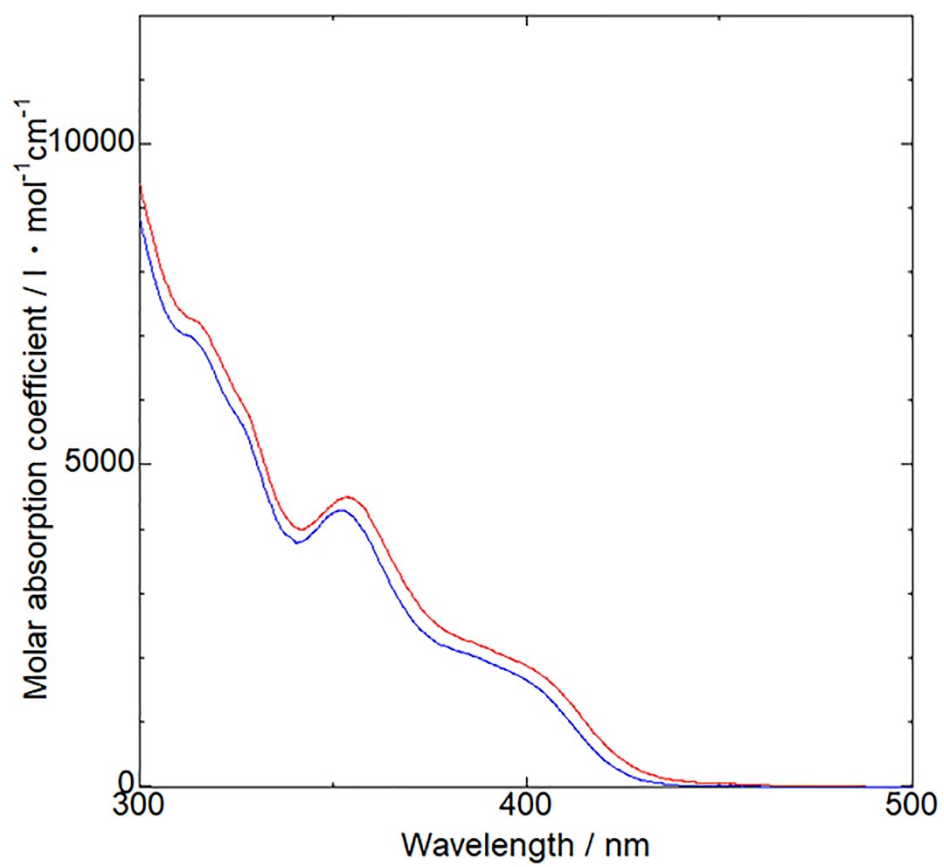

Figure S9. Absorption spectra of **1** in DMA (red,  $1.85 \times 10^{-5}$  M) and DMF (blue,  $2.46 \times 10^{-5}$  M) solution.

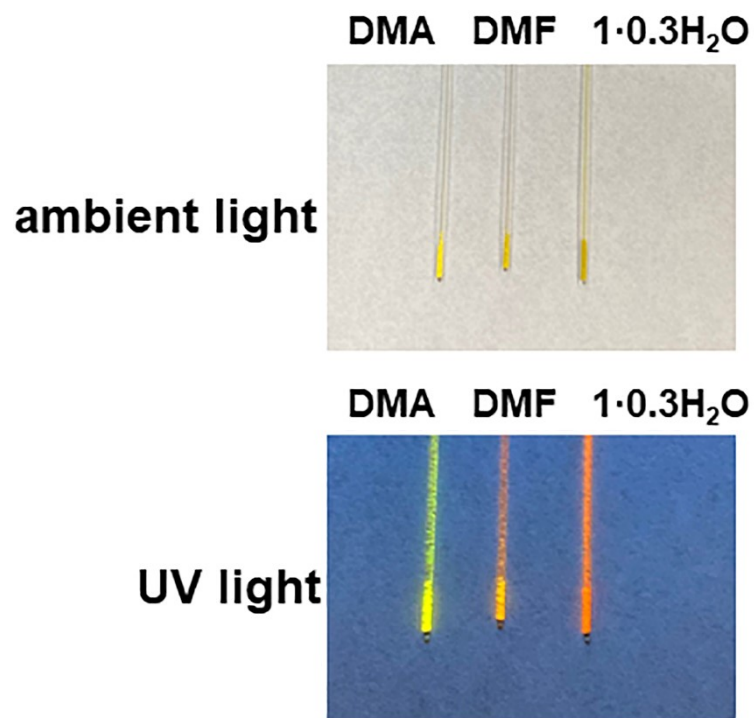

Figure S10. Photographs of  $1 \cdot 0.3\text{H}_2\text{O}$  compared with DMF and DMA vapor exposure under ambient light (top) and UV light irradiation (bottom).

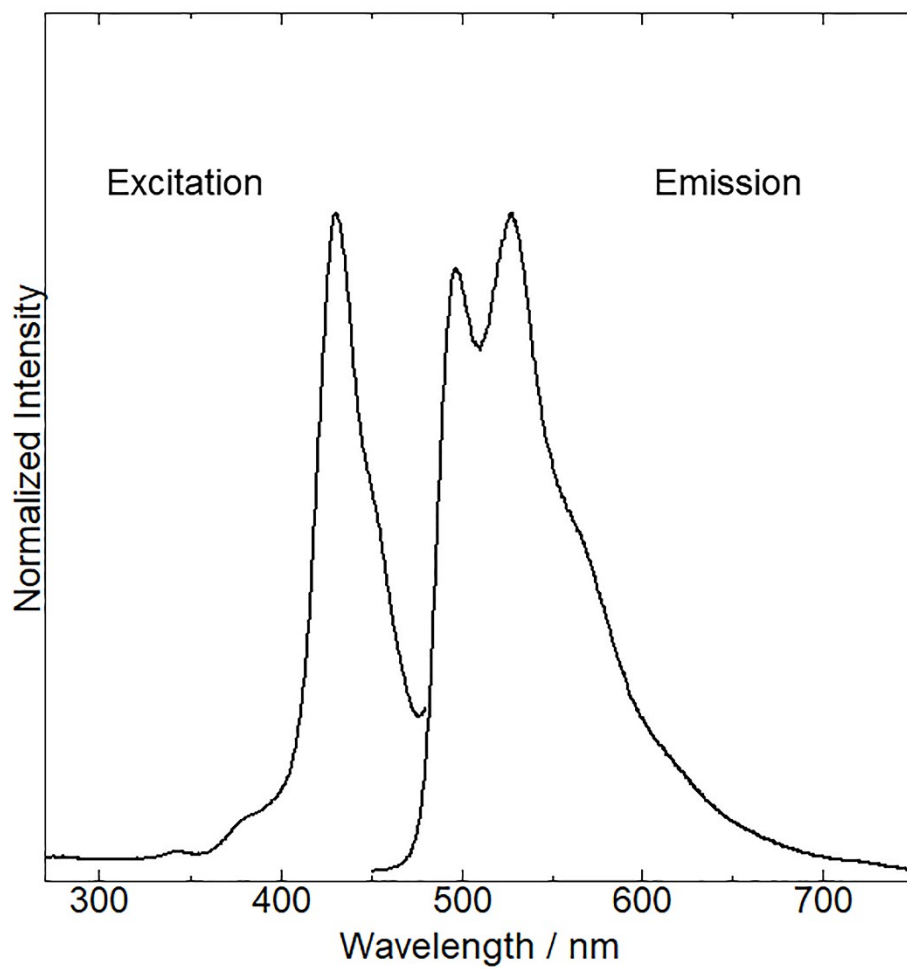

Figure S11. Emission ( $\lambda_{\text{ex}}=400$  nm) and excitation ( $\lambda_{\text{em}}=527$  nm) spectrum of **1** in DMA solution.

Table S1. Selected bond length and intermolecular Pt···Pt interactions of **1·3DMA** and **1·0.75DMF** at 90 K.

| <b>Complex</b> | <b>1·3DMA</b> | <b>1·0.75DMF</b>            |
|----------------|---------------|-----------------------------|
| Pt1-N1         | 2.070(3) Å    | 2.08(1) Å                   |
| Pt1-C1         | 2.027(3) Å    | 2.01(1) Å                   |
| Pt1-C12        | 1.942(4) Å    | 1.97(1) Å                   |
| Pt1-C13        | 2.027(3) Å    | 2.01(2) Å                   |
| Pt2-N4         | -             | 2.04(1) Å                   |
| Pt2-C14        | -             | 2.05(1) Å                   |
| Pt2-C25        | -             | 1.93(2) Å                   |
| Pt2-C26        | -             | 2.03(1) Å                   |
| Pt1···Pt1      | 7.4967(3) Å   | -                           |
| Pt1···Pt2      | -             | 3.4765(6) Å,<br>6.7976(7) Å |
| Pt3-N7         | -             | 2.05(1) Å                   |
| Pt3-C27        | -             | 2.04(1) Å                   |
| Pt3-C38        | -             | 1.96(1) Å                   |
| Pt3-C39        | -             | 2.01(1) Å                   |
| Pt4-N10        | -             | 2.05(1) Å                   |
| Pt4-C40        | -             | 2.03(1) Å                   |
| Pt4-C51        | -             | 1.95(2) Å                   |
| Pt4-C52        | -             | 2.03(1) Å                   |
| Pt3···Pt4      | -             | 3.3714(7) Å,<br>6.9444(7) Å |

Table S2. Comparison for possible molecular composition and that found from elemental analysis.

| composition                   | C (%) | H (%) | N (%) |
|-------------------------------|-------|-------|-------|
| 1·0.1H <sub>2</sub> O         | 30.55 | 1.22  | 8.22  |
| 1·0.2H <sub>2</sub> O         | 30.44 | 1.26  | 8.19  |
| 1·0.3H <sub>2</sub> O         | 30.34 | 1.29  | 8.16  |
| 1·0.4H <sub>2</sub> O         | 30.23 | 1.33  | 8.14  |
| 1·0.5H <sub>2</sub> O         | 30.13 | 1.36  | 8.11  |
| 1·0.6H <sub>2</sub> O         | 30.02 | 1.40  | 8.08  |
| 1·0.7H <sub>2</sub> O         | 29.92 | 1.43  | 8.05  |
| 1·0.8H <sub>2</sub> O         | 29.81 | 1.46  | 8.02  |
| 1·0.9H <sub>2</sub> O         | 29.71 | 1.50  | 8.00  |
| Found from Elemental analysis | 30.19 | 1.45  | 8.09  |

Table S3. Lattice constant refinement result for **1** after DMA and DMF vapor exposure compared with the single crystals.

| $\square$                       | a / Å      | b / Å      | c / Å      | $\alpha / ^\circ$ | $\beta / ^\circ$ | $\gamma / ^\circ$ |
|---------------------------------|------------|------------|------------|-------------------|------------------|-------------------|
| <b>1·3DMA</b> single crystal    | 7.4967(2)  | 10.2891(3) | 20.1177(5) | 79.821(1)         | 87.171(1)        | 74.152(1)         |
| DMA vapor exposure              | 7.580(7)   | 10.47(1)   | 20.18(2)   | 79.75(5)          | 87.65(5)         | 73.57(4)          |
| <b>1·0.75DMF</b> single crystal | 41.7895(9) | 8.5044(2)  | 21.2104(4) | 90                | 107.837(1)       | 90                |
| DMF vapor exposure              | 41.969(9)  | 8.616(2)   | 21.503(3)  | 90                | 108.42(2)        | 90                |
